# Supplementary material for: Improved Antioxidant Capacity of Akebia trifoliata Fruit Inoculated Fermentation by Plantilactobacillus plantarum, Mechanism of Anti-Oxidative Stress through Network Pharmacology, Molecular Docking and Experiment Validation by HepG2 Cells
Source: MDPI journal article supplement (doi:10.3390/fermentation9050432), 2023-04-29
Supplement: s1 [file s1]

## Supplementary Material

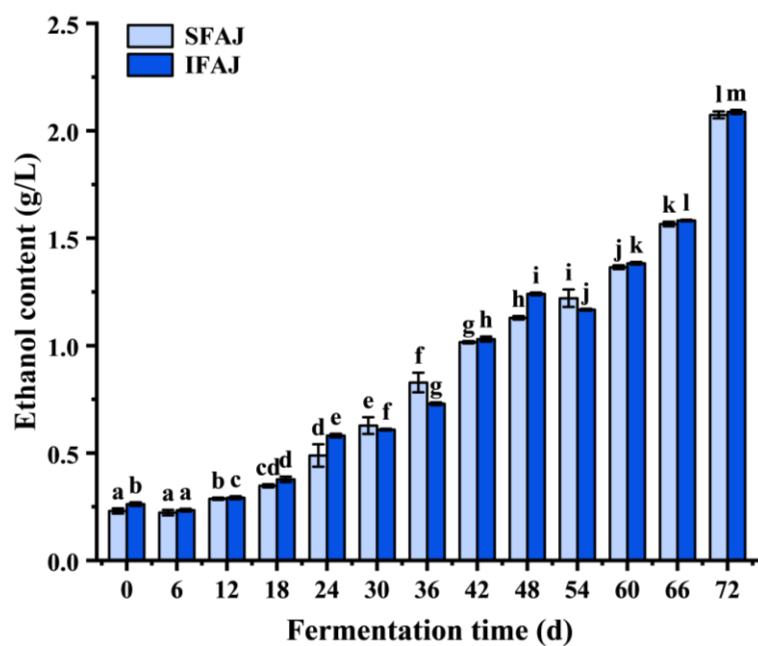

Figure S1. Changes in ethanol content of SFAJ and IFAJ during fermentation. Different letters indicate significant differences in the same group among samples from different fermentation time points ( $p < 0.05$ )
