# Supplementary material for: Improved Antioxidant Capacity of Akebia trifoliata Fruit Inoculated Fermentation by Plantilactobacillus plantarum, Mechanism of Anti-Oxidative Stress through Network Pharmacology, Molecular Docking and Experiment Validation by HepG2 Cells
Source: MDPI journal article supplement (doi:10.3390/fermentation9050432), 2023-04-29
Supplement: s1 [file s1]

Archive with 1 entries (1 files):
- fermentation-2359815-supplementary.pdf
